# Supplementary material
Source: Royal Society of Chemistry journal article supplement (doi:10.1039/d6gc01769j)
Supplement: d6gc01769j1.pdf [file d6gc01769j1.pdf]

## **Electronic Supplementary Information:**

### **Synergistic delignification of corncob with a phenoxyethanol/alkaline hydrogen peroxide biphasic system under mild conditions and mechanistic insights**

Yuqiang Liu <sup>a</sup>, Liang Yuan <sup>a,\*</sup>, Junli Ren <sup>b</sup>, Chuanfu Liu <sup>b</sup>, Zengyong Li <sup>a,\*</sup>

<sup>a</sup> School of Materials and Chemistry, Anhui Agricultural University, Hefei, 230036, China.

<sup>b</sup> State Key Laboratory of Pulp and Paper Engineering, South China University of Technology, Guangzhou, 510640, China.

\* Corresponding author: Zengyong Li; Liang Yuan

E-mail addresses: [zyli@ahau.edu.cn](mailto:zyli@ahau.edu.cn) (Z. Li); [yuanliang2020@ahau.edu.cn](mailto:yuanliang2020@ahau.edu.cn) (L. Yuan)

### **E-factor calculation**

The E-factor of corncob fractionation by EPH/AHP pretreatment was calculated according to the following equation:

$$E\text{-factor} = \frac{\textit{Weight of total inputs} - \textit{Weight of products}}{\textit{Weight of products}} \times 100\% \#$$

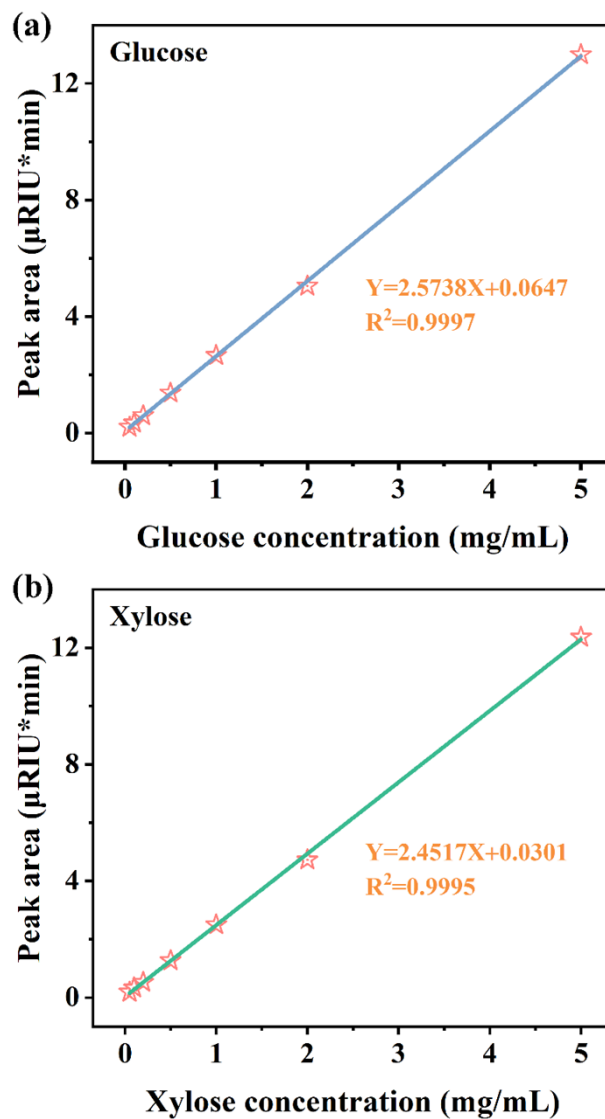

**Fig. S1.** Calibration curves of (a) glucose and (b) xylose.

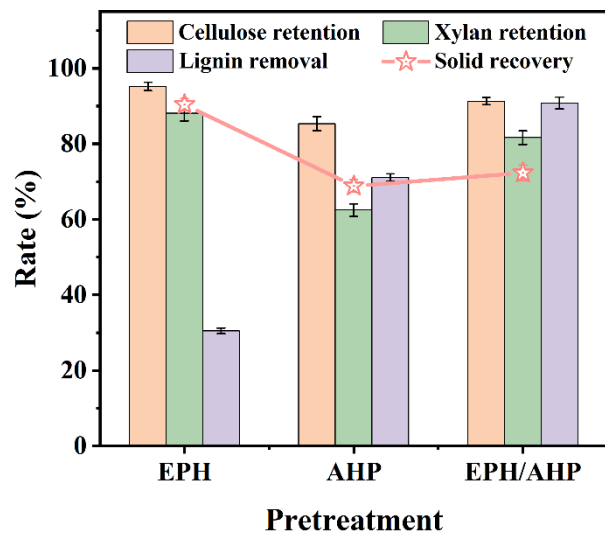

**Fig. S2.** (a) Fractionation efficiency of poplar components using different solvent systems.

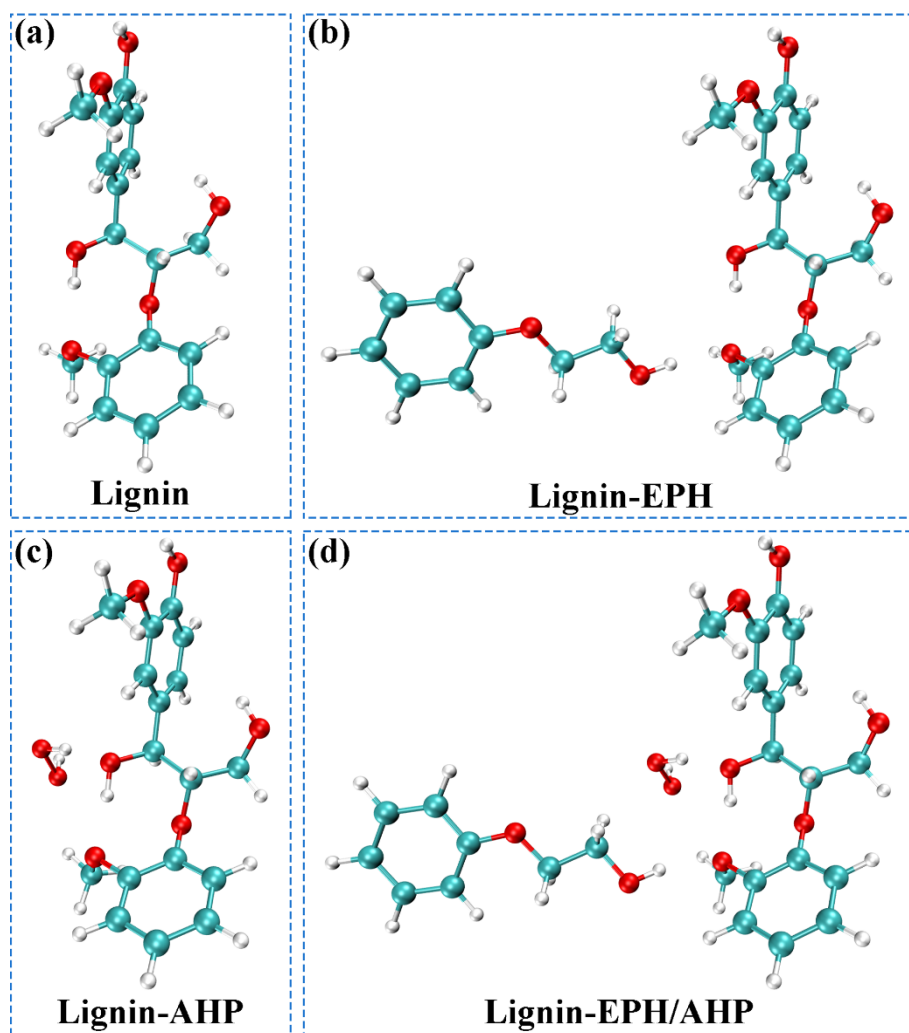

**Fig. S3.** Structures of Lignin, Lignin-EPH, Lignin-AHP and Lignin-EPH/AHP.

**Table S1** Chemical compositions of corncob.

| Chemical compositions (%) |            |             |            |                        |           |           |           |
|---------------------------|------------|-------------|------------|------------------------|-----------|-----------|-----------|
| Samples                   | Cellulose  | Xylan       | Lignin     | Solvent<br>extractives | Ash       | Arabinan  | Acetyl    |
| Corncob                   | 37.31±0.27 | 28.60±0.294 | 16.63±0.14 | 3.22±0.21              | 2.07±0.05 | 5.21±0.17 | 4.42±0.20 |

**Table S2** Peak-differentiation of C 1s in high resolution XPS spectra of raw and EPH/AHP pretreated corncob.

| Samples | C 1s  |       |       |      | O/C  |
|---------|-------|-------|-------|------|------|
|         | C1    | C2    | C3    | C3   |      |
| Raw     | 60.29 | 25.08 | 10.63 | 4.00 | 0.40 |
| EPH/AHP | 31.26 | 46.61 | 15.98 | 4.15 | 0.68 |

**Table S3** Comparison of pretreatment performance between the EPH/AHP system and different pretreatment systems.

| Samples            | Solvents                               | Tem. (K) | Time (min) | Cellulose Retention (%) | Lignin removal (%) | Glucose yield (%) | Reference |
|--------------------|----------------------------------------|----------|------------|-------------------------|--------------------|-------------------|-----------|
| Corn cob           | EPH/AHP                                | 343      | 90         | 91.86                   | 85.21              | 98.61             | This work |
| Corn stover        | EPH/STA                                | 403      | 90         | 85.60                   | 88.54              | 94.27             | [1]       |
| Rice straw         | EPH/H <sub>2</sub> SO <sub>4</sub>     | 393      | 120        | 86.48                   | 63.16              | 80.94             | [2]       |
| Rice straw         | EPH/H <sub>2</sub> SO <sub>4</sub>     | 393      | 180        | 87.34                   | 53.17              | 88.06             | [3]       |
| <i>Moso</i> bamboo | GVL/TsOH                               | 403      | 60         | 91.5                    | 98.4               | 77.32             | [4]       |
| Masson pine        | GVL/H <sub>2</sub> SO <sub>4</sub>     | 423      | 60         | 83.66                   | 87.2               | 76.8              | [5]       |
| Sugarcane leaf     | GVL/FeCl <sub>3</sub>                  | 393      | 180        | 81.0                    | 74.0               | 85.5              | [6]       |
| Wheat straw        | 2-MeTHF/TsOH                           | 413      | 180        | 95.69                   | 57.18              | 98.82             | [7]       |
| Poplar chip        | TsOH/pentanol-MT                       | 393      | 40         | 93.37                   | 92.79              | 96.50             | [8]       |
| Masson pine        | BDO/H <sub>2</sub> SO <sub>4</sub> -NS | 443      | 60         | 91.17                   | 81.83              | 88.23             | [9]       |

EPH: 2-phenoxyethanol; STA: Silicotungstic acid; GVL:  $\gamma$ -valerolactone; TsOH: p-toluenesulfonic acid; H<sub>2</sub>SO<sub>4</sub>: sulfuric acid; MT: mannitol; BDO: 1,4-butanediol; NS: 2-naphthol-7-sulphonate.

**Table S4** Comparison of lignin removal between the EPH/AHP system and different pretreatment systems.

| Samples           | Conditions                                             | Lignin removal (%) | E <sub>a</sub> (kJ·mol <sup>-1</sup> ) | Reference |
|-------------------|--------------------------------------------------------|--------------------|----------------------------------------|-----------|
| Corncob           | EPH/AHP, 343 K, 90 min                                 | 85.21              | 23.36                                  | This work |
| Rice straw        | THFA/HCl, 413 K, 300 min                               | 95                 | 32.2                                   | [10]      |
| Rice straw        | NH <sub>4</sub> OH–KOH, 428 K, 45 min                  | 91.8               | 35.6                                   | [11]      |
| Rice husk         | Soda-ethanol, 433 K, 100 min                           | 91.7               | 38.59                                  | [12]      |
| Sugarcane bagasse | AcH/H <sub>2</sub> SO <sub>4</sub> , 363 K, 120 min    | 79.7               | 64.41                                  | [13]      |
| Bamboo            | EPH/H <sub>2</sub> SO <sub>4</sub> , 393 K, 60 min     | 84.1               | 68.0                                   | [14]      |
| Eucalyptus        | BTEAC/FA, 403 K, 180 min                               | 94.25              | 75.22                                  | [15]      |
| Wheat straw       | Ethanol/H <sub>2</sub> SO <sub>4</sub> , 413 K, 52 min | 96                 | 89.3                                   | [16]      |
| Eucalyptus        | Acid sulphite, 413 K, 196 min                          | 98                 | 138.4                                  | [17]      |

EPH: 2-phenoxyethanol; AHP: alkaline hydrogen peroxide; BTEAC: benzyltriethylammonium chloride; FA: formic acid; THFA: tetrahydrofurfuryl alcohol; AcH: aqueous acetic acid.

**Table S5** Hydrogen bonding interaction between lignin and solvents.

| Samples | Hydrogen bond energy (kcal·mol <sup>-1</sup> ) |            |         |
|---------|------------------------------------------------|------------|---------|
|         | Lignin-EPH                                     | Lignin-AHP | EPH-AHP |
| EPH     | -5.21                                          | –          | –       |
| AHP     | –                                              | -7.50      | –       |
| EPH/AHP | -4.68                                          | -7.34      | -0.44   |

## Reference

- 1 L. Jiang, M. Yu, W. Shu, L. Yang, W. Lan, D. Li, Z. Li and C. Liu, *Chem. Eng. J.*, 2024, **490**, 151654.
- 2 Q. Zhang, Y. Deng, X. Tan, W. Wang, Q. Yu, X. Chen, C. Miao, Y. Guo, Y. Zhang, X. Zhuang and Z. Yuan, *Ind. Crops Prod.*, 2020, **145**, 112091.
- 3 Q. Zhang, X. Tan, W. Wang, Q. Yu, Q. Wang, C. Miao, Y. Guo, X. Zhuang and Z. Yuan, *ACS Sustain. Chem. Eng.*, 2019, **7**, 8678–8686.
- 4 X. Yin, T. Cai, C. Liu, C. Huang, J. Wang, J. Hu, N. Li, J. Jiang and K. Wang, *Chem. Eng. J.*, 2022, **437**, 135408.
- 5 X. Xu, K. Wang, Y. Zhou, C. Lai, D. Zhang, C. Xia and A. Pugazhendhi, *Fuel* 2023, **338**, 127361.
- 6 S. Palliprath, N.J. Poolakkalody, K. Ramesh, S.M. Mangalan, S.P. Kabekkodu, R. Santiago and C. Manisseri, *Ind. Crops Prod.*, 2023, **197**, 116571.
- 7 Q. Zhan, Q. Lin, Y. Wu, Y. Liu, X. Wang and J. Ren, *Bioresour. Technol.*, 2023, **376**, 128887.
- 8 M. Madadi, M. Elsayed, F. Sun, J. Wang, K. Karimi, G. Song, M. Tabatabaei and M. Aghbashlo, *Bioresour. Technol.*, 2023, **371**, 128591.
- 9 H. Fang, X. Xie, Q. Chu, W. Tong and K. Song, *Bioresour. Technol.*, 2023, **376**, 128854.
- 10 R. Li, Z. Zhang, X. Wang, X. Zhao, M. Li, H. Xu and C. Huang, *Green Chem.*, 2025, **27**, 3044–3063.
- 11 E. P. Dagninoa, F. E. Felissiab, E. Chamorroa and M. C. Area, *Chem. Eng. Res. Des.*, 2018, **129**, 209–216.
- 12 Z. Zhang, J. Xu, J. Xie, Z. Zhou, S. Zhu, J. Li, W. Zhang and K. Chen, *Chem. Eng. J.*, 2024, **490**, 151745.
- 13 I. S. F. Mendes, A. Prates and D. V. Evtuguin, *Chem. Eng. J.*, 2024, **496**, 153959.
- 14 C.-L. Ho, K.-T. Wu, E. I. C. Wang and Y.-C. Su, *Ind. Eng. Chem. Res.*, 2011, **50**, 3849–3857.
- 15 X. Zhao and D. Liu, *Bioenerg. Res.*, 2012, **6**, 436–447.
- 16 G. Huang, J. X. Shi and T. A. G. Langrish, *Bioresour. Technol.*, 2007, **98**, 1218–1223.
- 17 D. Sidiras and E. Koukios, *Bioresour. Technol.*, 2004, **94**, 91–98.
